# Supplementary material for: Metabolic Effects of Vitamin B1 Therapy under Overnutrition and Undernutrition Conditions in Sheep
Source: MDPI journal article supplement (doi:10.3390/nu13103463), 2021-09-29
Supplement: s1 [file s1]

**Supplementary Table S1:** Pretreatment values of serum parameters

| Parameter                                    | CG <sup>1</sup> | T5 <sup>2</sup> | T10 <sup>3</sup> | SEM   | Treatment (P-Values) |
|----------------------------------------------|-----------------|-----------------|------------------|-------|----------------------|
| Creatine Kinase, $\mu\text{L}^{-1}$          | 180.2           | 151.5           | 154.8            | 7.8   | 0.28                 |
| Albumin, $\text{gdL}^{-1}$                   | 4.23            | 4.34            | 4.15             | 0.07  | 0.51                 |
| Aspartate aminotransferase, $\text{UL}^{-1}$ | 96.1            | 89.6            | 97.1             | 3.7   | 0.69                 |
| Total bilirubin, $\text{mgdL}^{-1}$          | 0.04            | 0.03            | 0.05             | 0.008 | 0.55                 |
| Calcium, $\text{mgdL}^{-1}$                  | 9.83            | 9.39            | 9.91             | 0.11  | 0.12                 |
| Cholesterol, $\text{mgdL}^{-1}$              | 93.2            | 92.0            | 91.7             | 3.4   | 0.98                 |
| Creatinine, $\text{mgdL}^{-1}$               | 0.81            | 0.85            | 0.93             | 0.03  | 0.17                 |
| Gama-Glutamyltransferase, $\mu\text{L}^{-1}$ | 60.3            | 65.3            | 67.5             | 1.5   | 0.14                 |
| Lactate Dehydrogenase, $\mu\text{L}^{-1}$    | 865.2           | 952             | 939.8            | 31.2  | 0.49                 |
| Magnesium, $\mu\text{L}^{-1}$                | 2.17            | 1.98            | 2.05             | 0.04  | 0.25                 |
| Phosphorous, $\text{mgdL}^{-1}$              | 5.13            | 5.86            | 5.01             | 0.31  | 0.50                 |
| Total Protein, $\text{gdL}^{-1}$             | 7.61            | 7.38            | 7.63             | 0.12  | 0.63                 |
| Triglycerides, $\text{mgdL}^{-1}$            | 11.2            | 10.4            | 16.4             | 1.7   | 0.38                 |
| Urea, $\text{mgdL}^{-1}$                     | 33.9            | 37.3            | 35.5             | 1.0   | 0.38                 |
| Sodium, $\text{mmolL}^{-1}$                  | 145.5           | 145.2           | 144.5            | 0.4   | 0.61                 |
| Potassium, $\text{mmolL}^{-1}$               | 5.23            | 5.18            | 4.97             | 0.06  | 0.19                 |
| Chloride, $\text{mmolL}^{-1}$                | 102.9           | 103.1           | 101.4            | 0.4   | 0.10                 |

<sup>1</sup>CG - Control<sup>2</sup>T5 – Thiamine treatment at a dose of 5mg/kg<sup>3</sup>T10 – Thiamine treatment at a dose of 10mg/kg
